# Supplementary material
Source: PubMed Central journal article supplement (PMC4176508)
Supplement: NIHMS624239-supplement-ESI.pdf [file NIHMS624239-supplement-ESI.pdf]

Supplementary information

### **3D Viscoelastic Traction Force Microscopy**

Jennet Toyjanova, Erin Hannen, Eyal Bar-Kochba, Eric M. Darling, David L. Henann, and Christian Franck\*

\*Corresponding Author: 182 Hope St. Box D, Providence, RI 02912, E-mail: [franck@brown.edu](mailto:franck@brown.edu)

Legends for supplementary figures:

Figure S1: Example of creep response portraying the material behavior under simple shear deformation with (a) applied stress and (b) induced strain as function of time for a material described by our constitutive relation.

Figure S2: Example of material relaxation response portraying the material behavior under simple shear deformation with (a) applied strain and (b) induced stress as function of time for a material described by our constitutive relation.
